# Supplementary material
Source: Springer Nature journal article supplement (https://www.springermedizin.de/resource/supplementary/12967_2012_1397_MOESM1_ESM.pdf/9573402)

**All HEVs (A)**

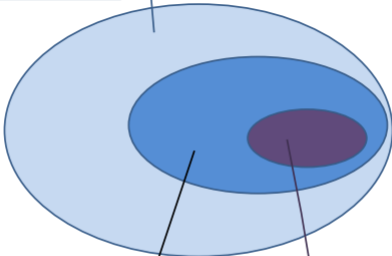

**Dilated HEVs (B)**

**Dilated HEVs with rbc  
within its lumen (C)**

Supplement: MOESM1 [file 9573402]
